# Supplementary material for: Synthesis and characterization of germa[n]pericyclynes
Source: Royal Society of Chemistry journal article supplement (doi:10.1039/c4dt00574k), 2014-01-01
Supplement: c4dt00574k1.pdf [file c4dt00574k1.pdf]

## Supporting Information

### Synthesis and Characterization of Germa[*n*]pericyclines

Hiroki Tanimoto,<sup>a</sup> Tomohiko Nagao,<sup>a</sup> Yasuhiro Nishiyama,<sup>a</sup> Tsumoru Morimoto,<sup>a</sup> Fumiyasu Iseda,<sup>a</sup>  
Yuko Nagato,<sup>a</sup> Toshimasa Suzuka,<sup>b</sup> Ken Tsutsumi,<sup>\*c</sup> and Kiyomi Kakiuchi<sup>\*a</sup>

<sup>a</sup> Graduate School of Materials Science, Nara Institute of Science and Technology (NAIST), 8916-5  
Takayamacho, Ikoma, Nara 630-0192, Japan

<sup>b</sup> Department of Chemistry, University of the Ryukyus, Nishihara, Okinawa 903-0213, Japan.

<sup>c</sup> Department of Applied Chemistry, Faculty of Engineering, Miyazaki University, 1-1 Gakuen  
Kibanadai-Nishi, Miyazaki 889-2155, Japan.

tsutsumi@cc.miyazaki-u.ac.jp; kakiuchi@ms.naist.jp

|                                                       |    |
|-------------------------------------------------------|----|
| General Information                                   | S1 |
| UV-visible and fluorescence emission spectra          | S2 |
| Cyclic voltammetry and differential pulse voltammetry | S4 |
| <sup>1</sup> H and <sup>13</sup> C NMR spectra        | S5 |

## General information

$^1\text{H}$  and  $^{13}\text{C}$  NMR spectra were recorded using a Jeol JNM-ECP500 spectrometer (500 MHz for  $^1\text{H}$  NMR and 125 MHz for  $^{13}\text{C}$  NMR). Chemical shifts are reported as  $\delta$  values in ppm and calibrated with respect to the residual solvent peak ( $\text{CDCl}_3$ ,  $\delta$  7.26 for  $^1\text{H}$  NMR and  $\delta$  77.00 for  $^{13}\text{C}$  NMR) or tetramethylsilane ( $\delta$  0 for  $^1\text{H}$  NMR). The abbreviations used are as follows: s (singlet), d (doublet), t (triplet), q (quartet), sept (septet), br (broad peak), and m (complex multiplet). Melting points were measured using a Yanaco Micro melting point apparatus. Infrared spectra were measured using a Jasco FT-IR-4200 spectrometer. Mass spectra were recorded using a Jeol JMS-700 MStation [EI (70 eV), CI, FAB, and ESI]. X-ray diffraction (XRD) analyses were performed using a Rigaku R-Axis RAPID/S imaging plate diffractometer.

UV/visible spectra were recorded using Jasco V-630. Fluorescence spectra were collected using Jasco FP-6500. Raman spectra were obtained using a Jasco laser Raman spectrophotometer, NRS-2100. The cyclic voltammetry measurements of the compounds were performed using a BAS electrochemical analyser ALS612D in dichloromethane containing  $n\text{-Bu}_4\text{NPF}_6$  as the supporting electrolyte at 298 K (100 mV  $\text{s}^{-1}$ ). The glassy carbon working electrode was polished using BAS polishing alumina suspension and rinsed with water before use. The counter electrode was a platinum wire. The measured potentials were recorded with respect to  $\text{Ag}/\text{AgNO}_3$  and normalized with respect to  $\text{Fc}/\text{Fc}^+$ . Flash column chromatography was performed using Merck Silica gel 60. The progress of the reactions was monitored by silica gel thin layer chromatography (TLC) (Merck TLC Silica gel 60  $\text{F}_{254}$ ). The purification of the mixture of germapericyclynes was performed using a LC-908 recycling preparative high-performance liquid chromatography (HPLC) equipped with a JAIGEL 2H-40 column made by Japan Analytical Industry Co., Ltd. Ethanol solutions of phosphomolybdic acid and anisaldehyde-acetic acid-sulfuric acid were used as the TLC stains. All the reagents were purchased from Sigma-Aldrich, Wako Pure Chemical Industries, Ltd, TCI (Tokyo Chemical Industry, Co. Ltd), Kanto Chemical Co. Inc., and Nakalai Tesque. Anhydrous tetrahydrofuran (THF) was purchased from Kanto Chemical. Density Functional Theory (DFT) calculations were performed using the Gaussian09, and the geometries of the molecules were optimized by employing the B3LYP density functionals and the 6-311G\* basis set in this series of calculations.

## UV-visible and fluorescence emission spectra

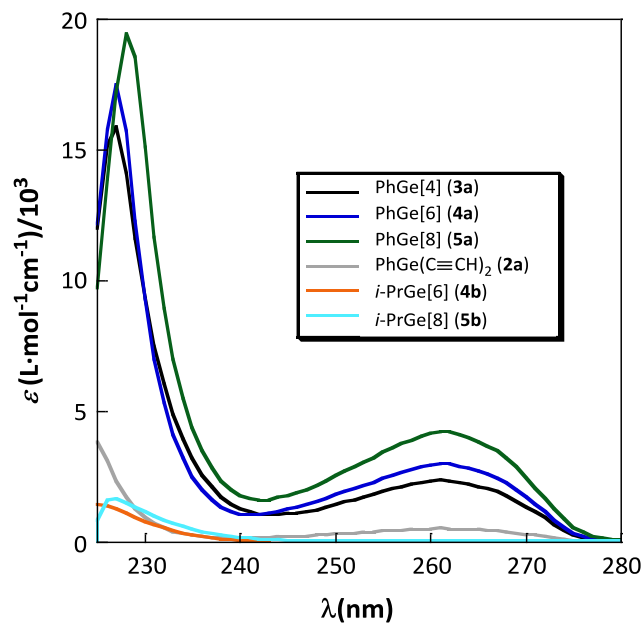

| Compounds | Absorption maxima / nm ( $\epsilon$ ) |
|-----------|---------------------------------------|
| <b>2a</b> | 225 (3840), 261 (531)                 |
| <b>3a</b> | 227 (15900), 261 (2375)               |
| <b>4a</b> | 227 (17500), 261 (3010)               |
| <b>5a</b> | 228 (19440), 261 (4240)               |
| <b>4b</b> | 225 (1446)                            |
| <b>5b</b> | 227 (1648)                            |

Fig S1. UV-visible spectra of germa[*n*]pericyclines (0.1 mM in CH<sub>2</sub>Cl<sub>2</sub>)

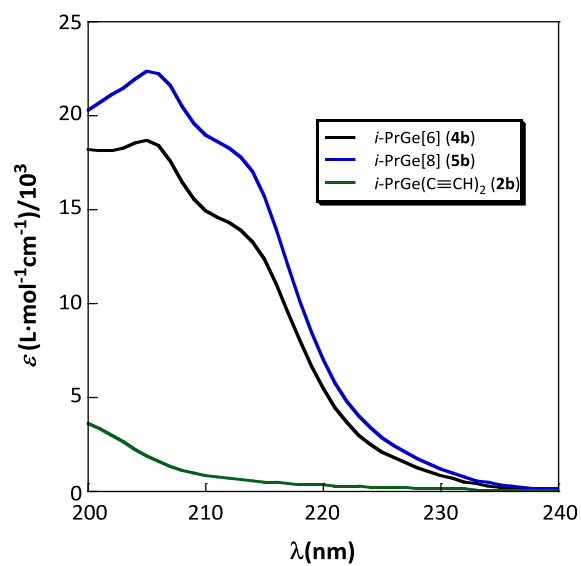

| Compounds | Absorption maxima / nm ( $\epsilon$ ) |
|-----------|---------------------------------------|
| <b>2b</b> | —                                     |
| <b>4b</b> | 205 (18683), 213 (13919)              |
| <b>5b</b> | 205 (22377), 213 (17798)              |

Fig S2. UV-visible spectra of isopropylgerma[*n*]pericyclines (0.1 mM in hexane)

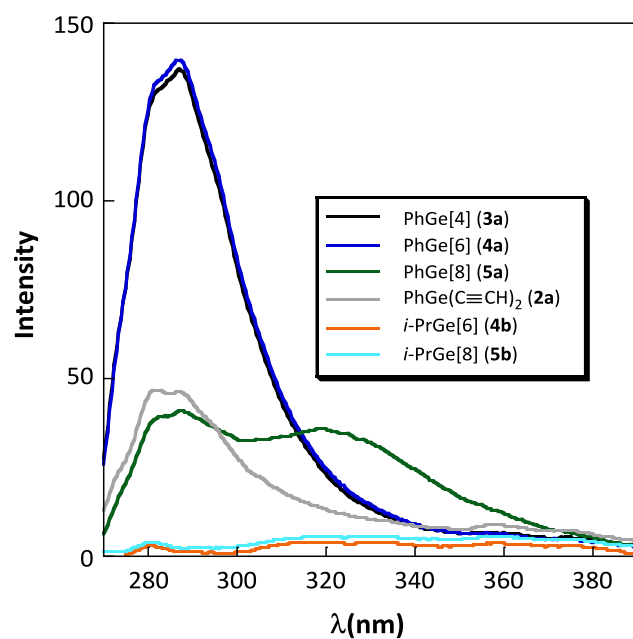

| Compounds | Emission maxima / nm |
|-----------|----------------------|
| <b>2a</b> | 282, 288             |
| <b>3a</b> | 281, 288             |
| <b>4a</b> | 281, 288             |
| <b>5a</b> | 281, 288, 318        |
| <b>4b</b> | —                    |
| <b>5b</b> | —                    |

**Fig S3.** Fluorescence emission spectra of germa[*n*]pericyclines (0.1 mM in CH<sub>2</sub>Cl<sub>2</sub>, λ<sub>EXT</sub> = 260 nm)

## Cyclic voltammetry (CV) and differential pulse voltammetry (DPV)

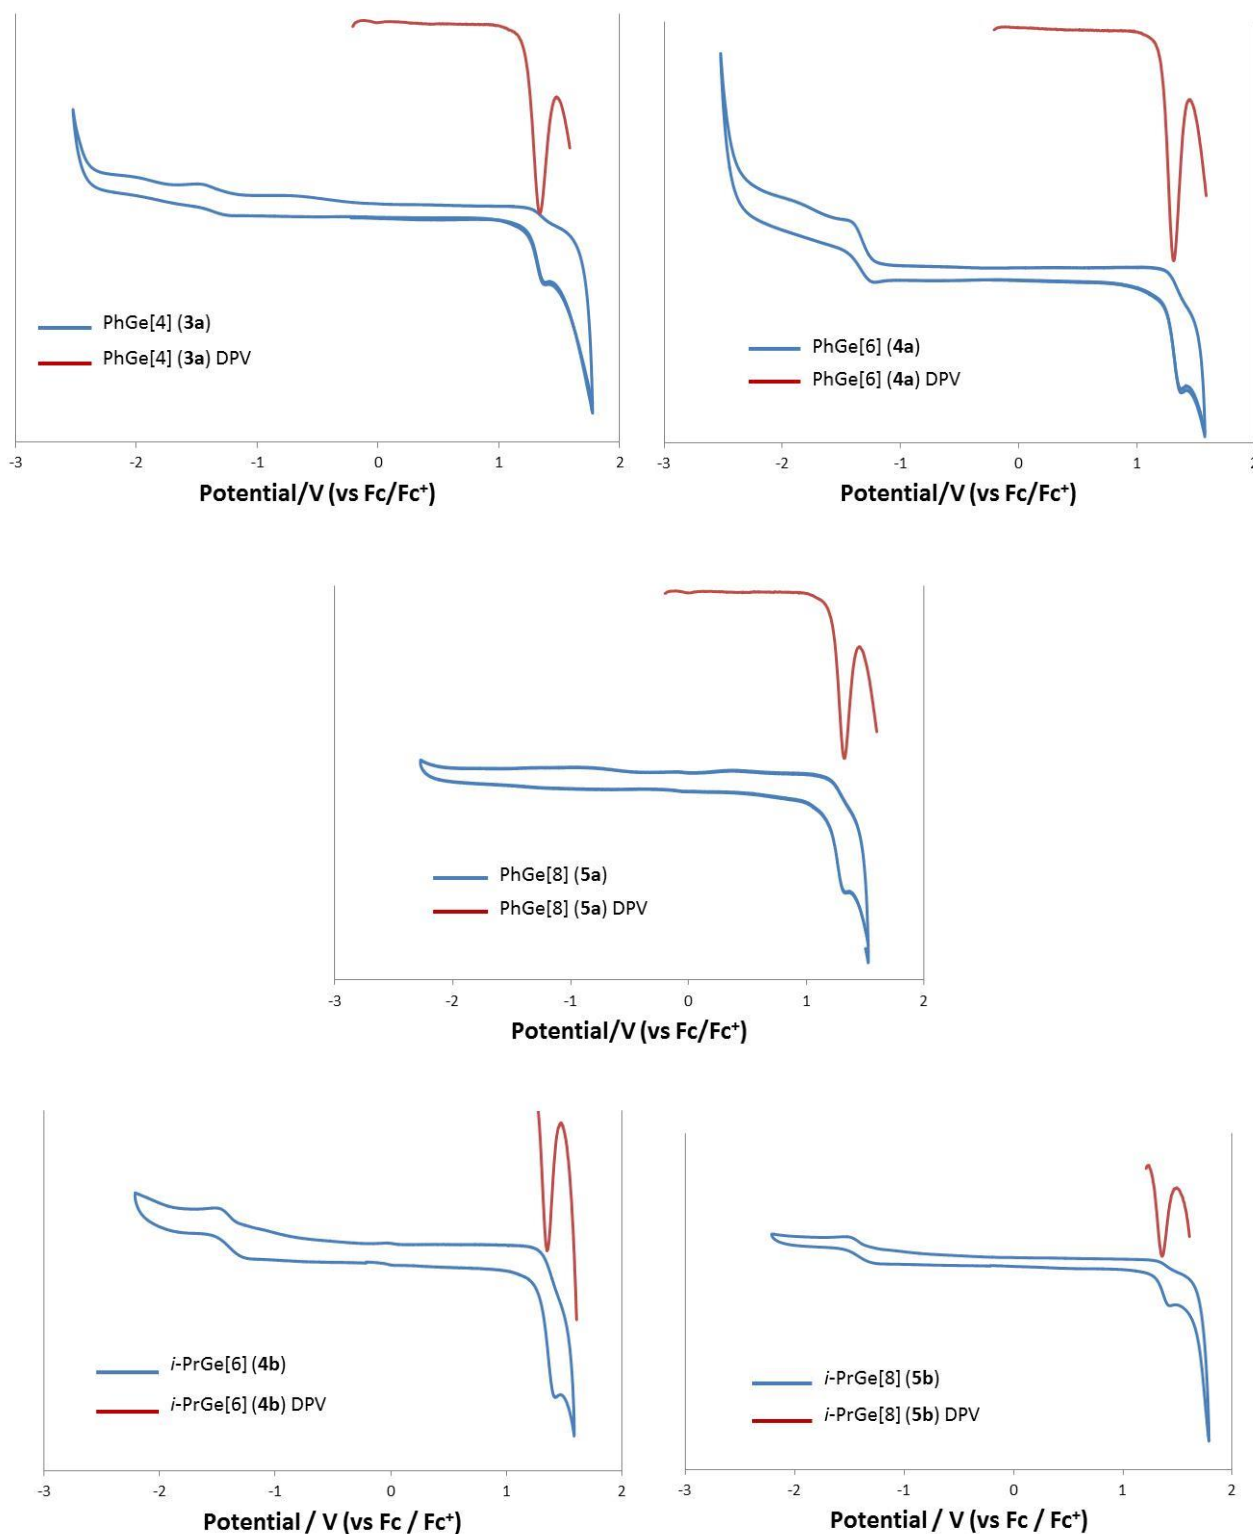

| Compounds | Oxidation potential from DPV / V |
|-----------|----------------------------------|
| <b>3a</b> | 1.336                            |
| <b>4a</b> | 1.312                            |
| <b>5a</b> | 1.320                            |
| <b>4b</b> | 1.352                            |
| <b>5b</b> | 1.356                            |

**Fig S3.** Cyclic and differential pulse voltammograms of germa[*n*]pericyclines (1.0 mM (3a, 4a, 4b, and 5b); 0.5 mM (5a) in 0.1 M *n*-Bu<sub>4</sub>NPF<sub>6</sub>/CH<sub>2</sub>Cl<sub>2</sub> solution; Scan rate = 0.1 V/s)

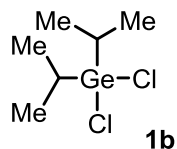

Z:\NMR-data\no.23 data\tn\_01\_023 data Proton-1-1.jdf

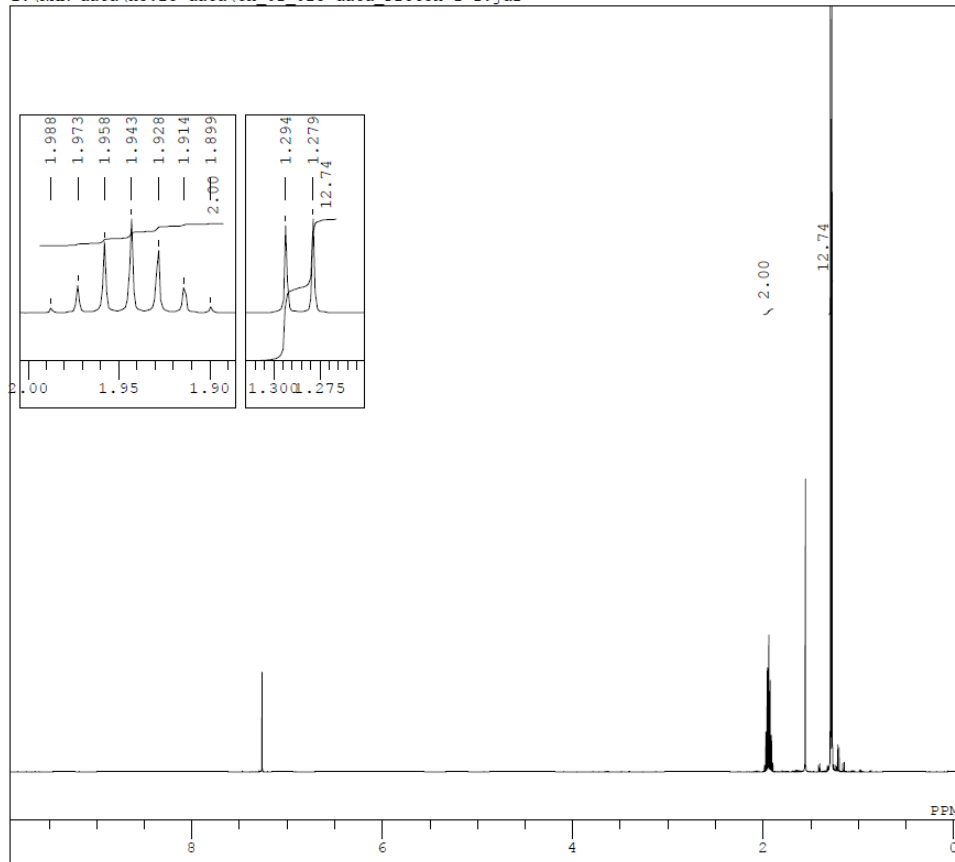

DFILE tn\_01\_023 data\_Proton-1-1.jdf  
COMNT single\_pulse  
DATIM 2013-09-21 11:29:39  
OBNUC 1H  
EXMOD proton.jxp  
OBFRQ 500.16 MHz  
OBSET 2.41 KHz  
OBFIN 6.01 Hz  
POINT 16384  
FREQU 9384.38 Hz  
SCANS 8  
ACQTM 1.7459 sec  
PD 5.0000 sec  
PW1 6.22 usec  
IRNUC 1H  
CTEMP 18.8 c  
SLVNT CDCL3  
EXREF 7.26 ppm  
BF 0.10 Hz  
RGAIN 44

Z:\NMR-data\no.23 data\tn\_01\_023 data Carbon-1-1.als

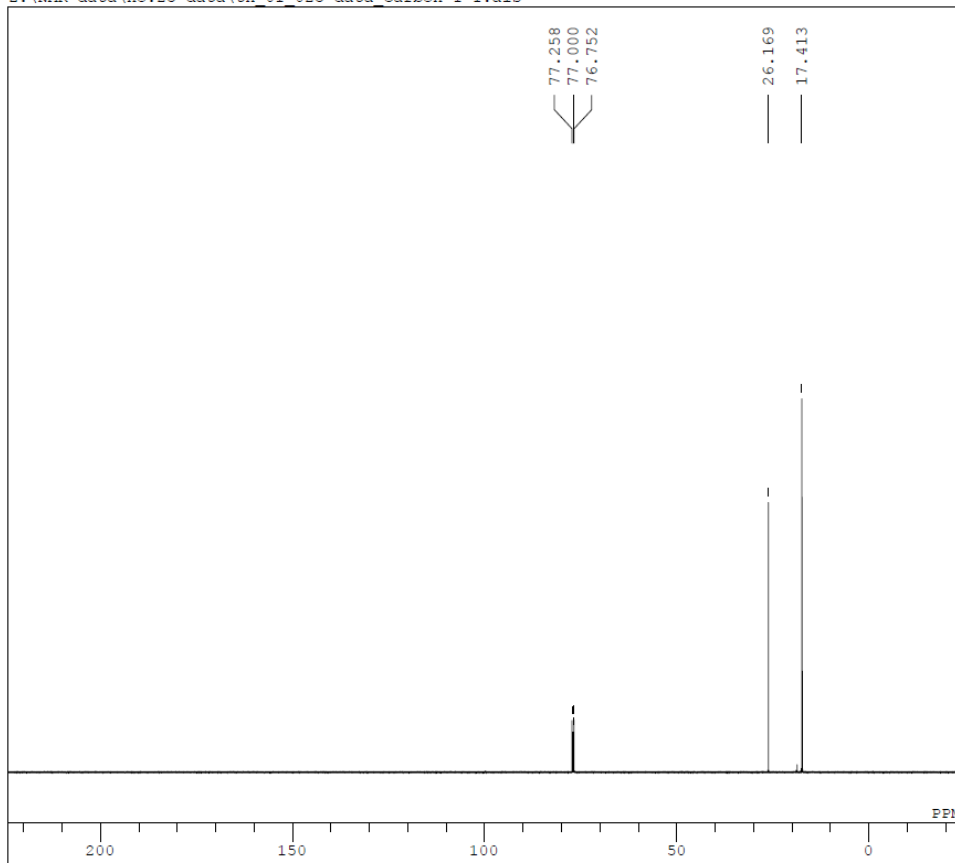

DFILE tn\_01\_023 data\_Carbon-1-1.als  
COMNT single pulse decoupled gated NOE  
DATIM 2013-09-21 11:34:54  
OBNUC 13C  
EXMOD carbon.jxp  
OBFRQ 125.77 MHz  
OBSET 7.87 KHz  
OBFIN 4.21 Hz  
POINT 26214  
FREQU 31446.54 Hz  
SCANS 186  
ACQTM 0.8336 sec  
PD 2.0000 sec  
PW1 3.12 usec  
IRNUC 1H  
CTEMP 19.0 c  
SLVNT CDCL3  
EXREF 77.00 ppm  
BF 0.10 Hz  
RGAIN 58

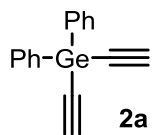

2:\NMR-data\tn\_01\_002 data Proton-1-1.als

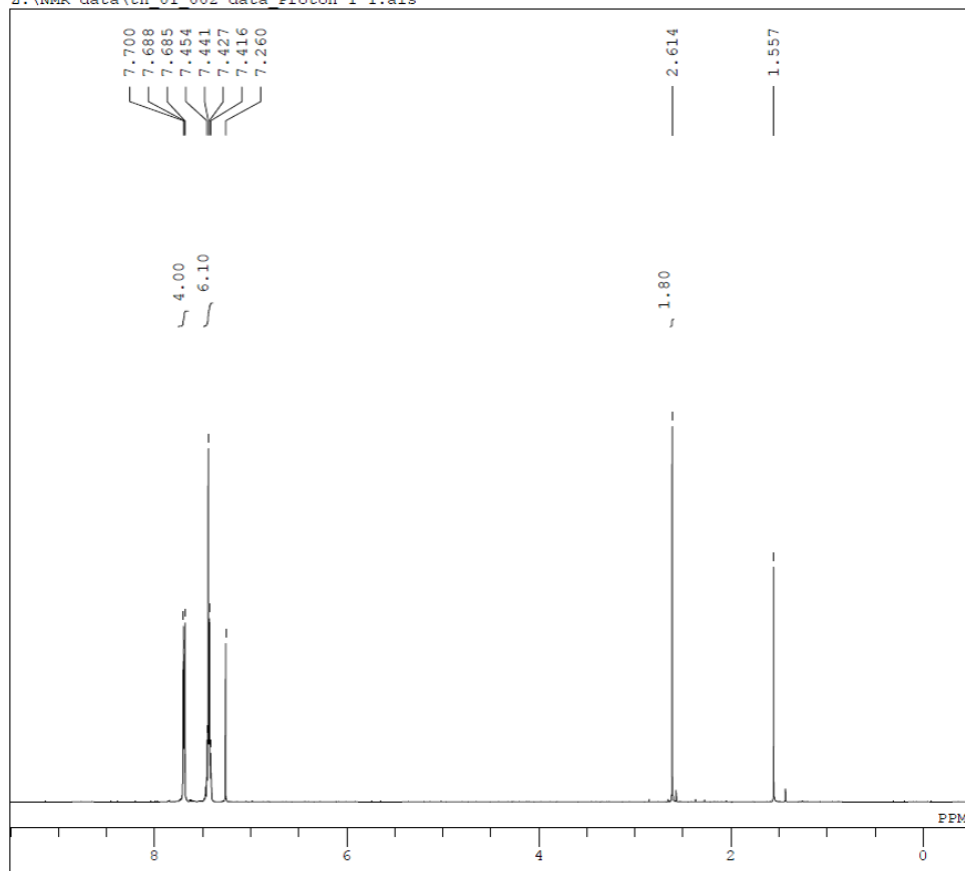

DFILE tn\_01\_002 data\_Proton-1-1.als  
 COMNT single\_pulse  
 DATIM 2013-06-04 10:51:06  
 OBNUC 1H  
 EXMOD proton.jxp  
 OBFRQ 500.16 MHz  
 OBSET 2.41 KHz  
 OBFIN 6.01 Hz  
 POINT 13107  
 FREQU 7507.51 Hz  
 SCANS 8  
 ACQTM 1.7459 sec  
 PD 5.0000 sec  
 PW1 6.22 usec  
 IRNUC 1H  
 CTEMP 19.6 c  
 SLVNT CDCL3  
 EXREF 7.26 ppm  
 BF 0.10 Hz  
 RGAIN 44

2:\NMR-data\tn\_01\_002 data Carbon-1-1.jdf

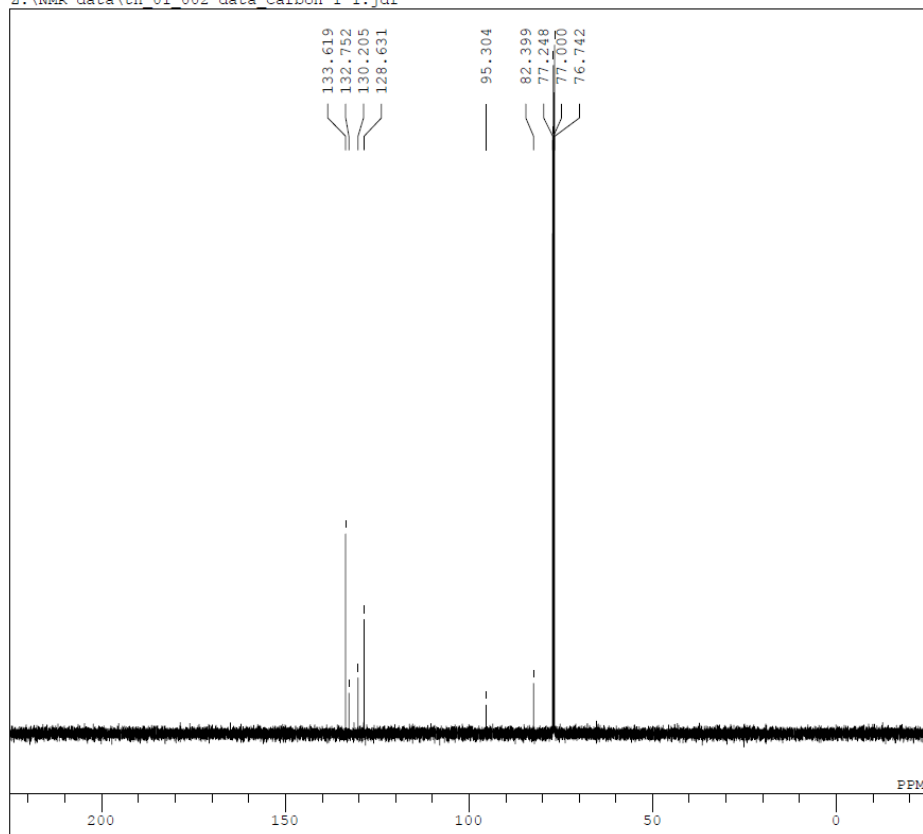

DFILE tn\_01\_002 data\_Carbon-1-1.jdf  
 COMNT single\_pulse decoupled gated NOE  
 DATIM 2013-06-04 10:54:54  
 OBNUC 13C  
 EXMOD carbon.jxp  
 OBFRQ 125.77 MHz  
 OBSET 7.87 KHz  
 OBFIN 4.21 Hz  
 POINT 32767  
 FREQU 39308.18 Hz  
 SCANS 503  
 ACQTM 0.8336 sec  
 PD 2.0000 sec  
 PW1 3.12 usec  
 IRNUC 1H  
 CTEMP 20.4 c  
 SLVNT CDCL3  
 EXREF 77.00 ppm  
 BF 0.10 Hz  
 RGAIN 56

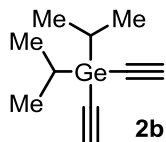

Z:\NMR-data\tn\_01\_003 data Proton-1-1.jdf

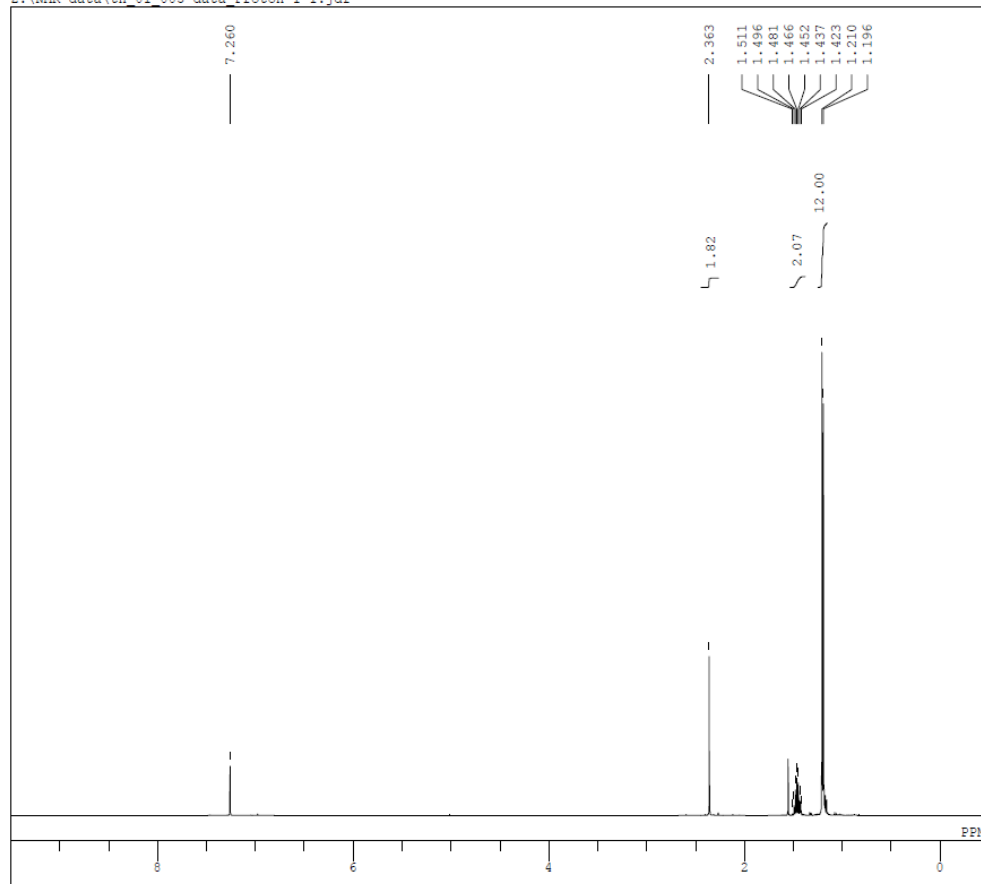

DFILE tn\_01\_003 data Proton-1-1.jdf  
 COMNT single\_pulse  
 DATIM 2013-05-31 18:41:46  
 OBNUC 1H  
 EXMOD proton.jxp  
 OBFRQ 500.16 MHz  
 OBSEI 2.41 KHz  
 OBFIN 6.01 Hz  
 POINT 16384  
 FREQU 9384.38 Hz  
 SCANS 8  
 ACQTM 1.7459 sec  
 PD 5.0000 sec  
 FWL 6.22 usec  
 IRNUC 1H  
 CTEMP 19.1 c  
 SLVNT CDCL3  
 EXREF 7.26 ppm  
 BF 0.10 Hz  
 RGAIN 42

Z:\NMR-data\tn\_01\_003 data Carbon-1-1.jdf

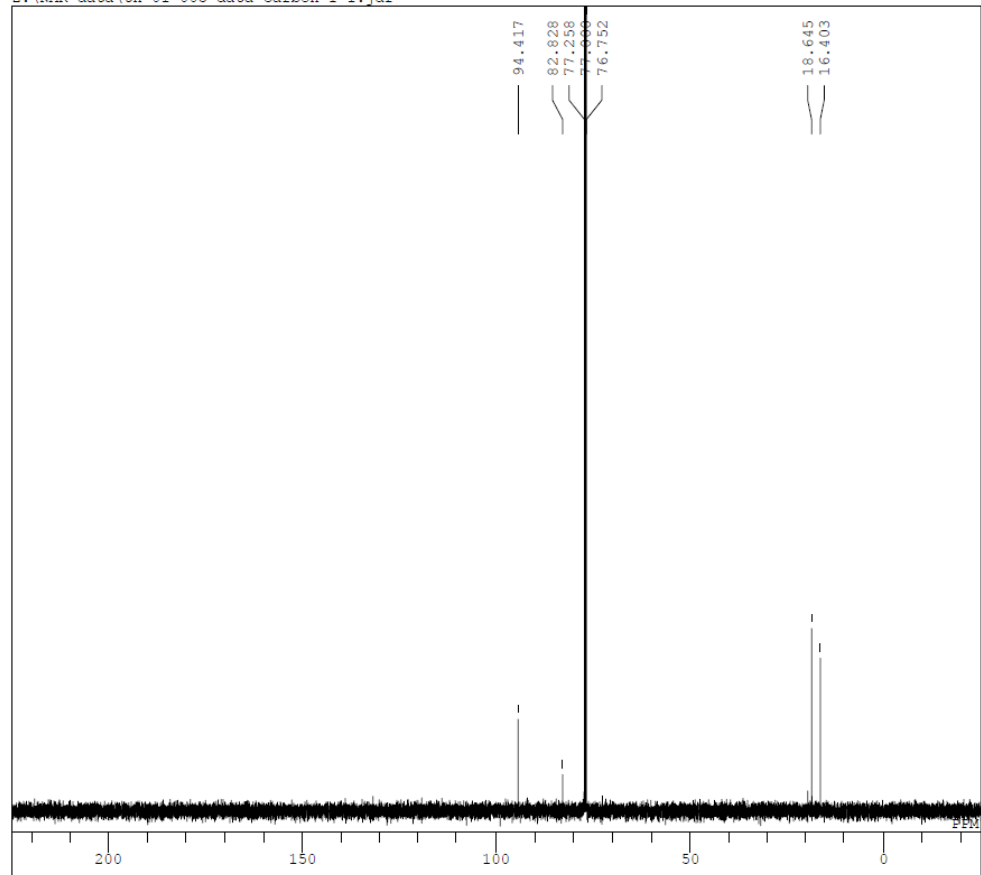

DFILE tn\_01\_003 data Carbon-1-1.jdf  
 COMNT single\_pulse decoupled gated NOE  
 DATIM 2013-05-31 18:43:16  
 OBNUC 13C  
 EXMOD carbon.jxp  
 OBFRQ 125.77 MHz  
 OBSEI 7.87 KHz  
 OBFIN 4.21 Hz  
 POINT 32767  
 FREQU 39308.18 Hz  
 SCANS 257  
 ACQTM 0.8336 sec  
 PD 2.0000 sec  
 FWL 3.12 usec  
 IRNUC 1H  
 CTEMP 19.3 c  
 SLVNT CDCL3  
 EXREF 77.00 ppm  
 BF 0.10 Hz  
 RGAIN 58

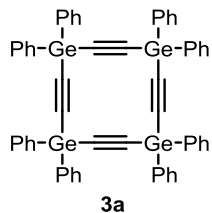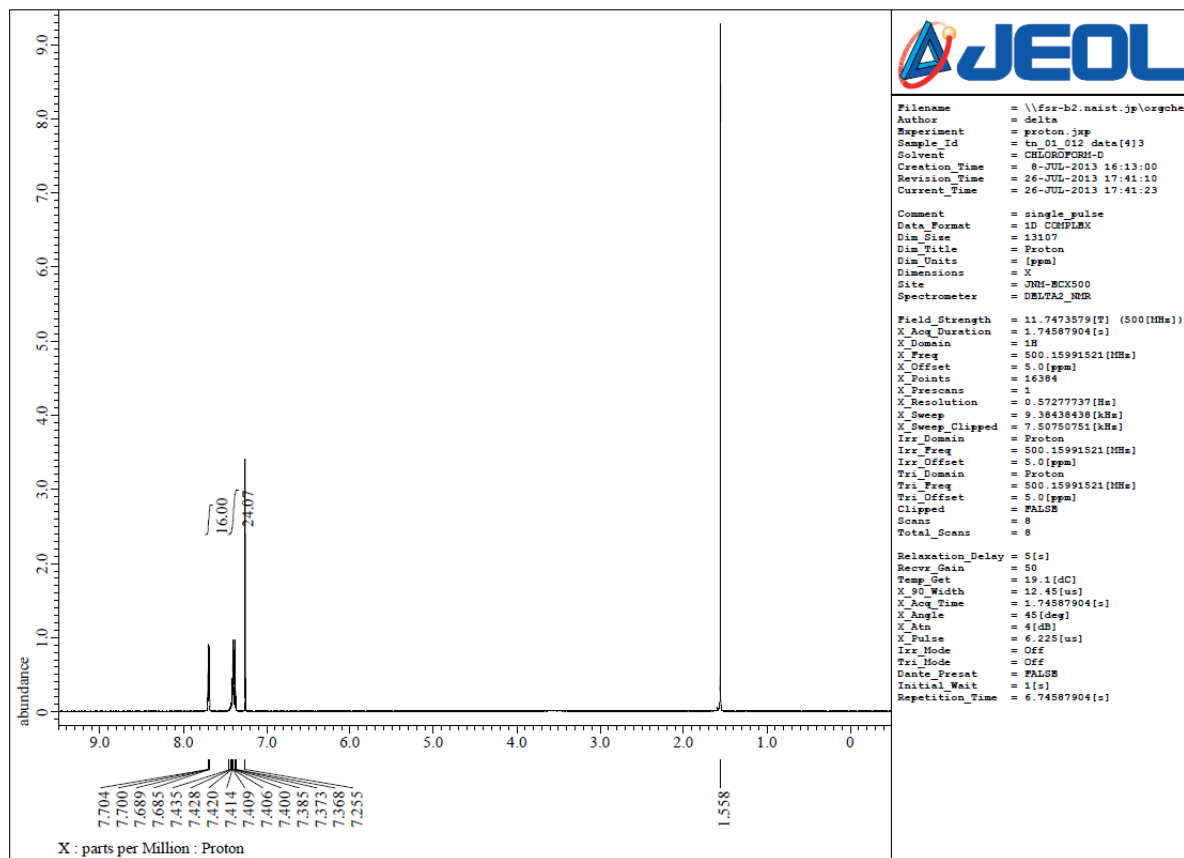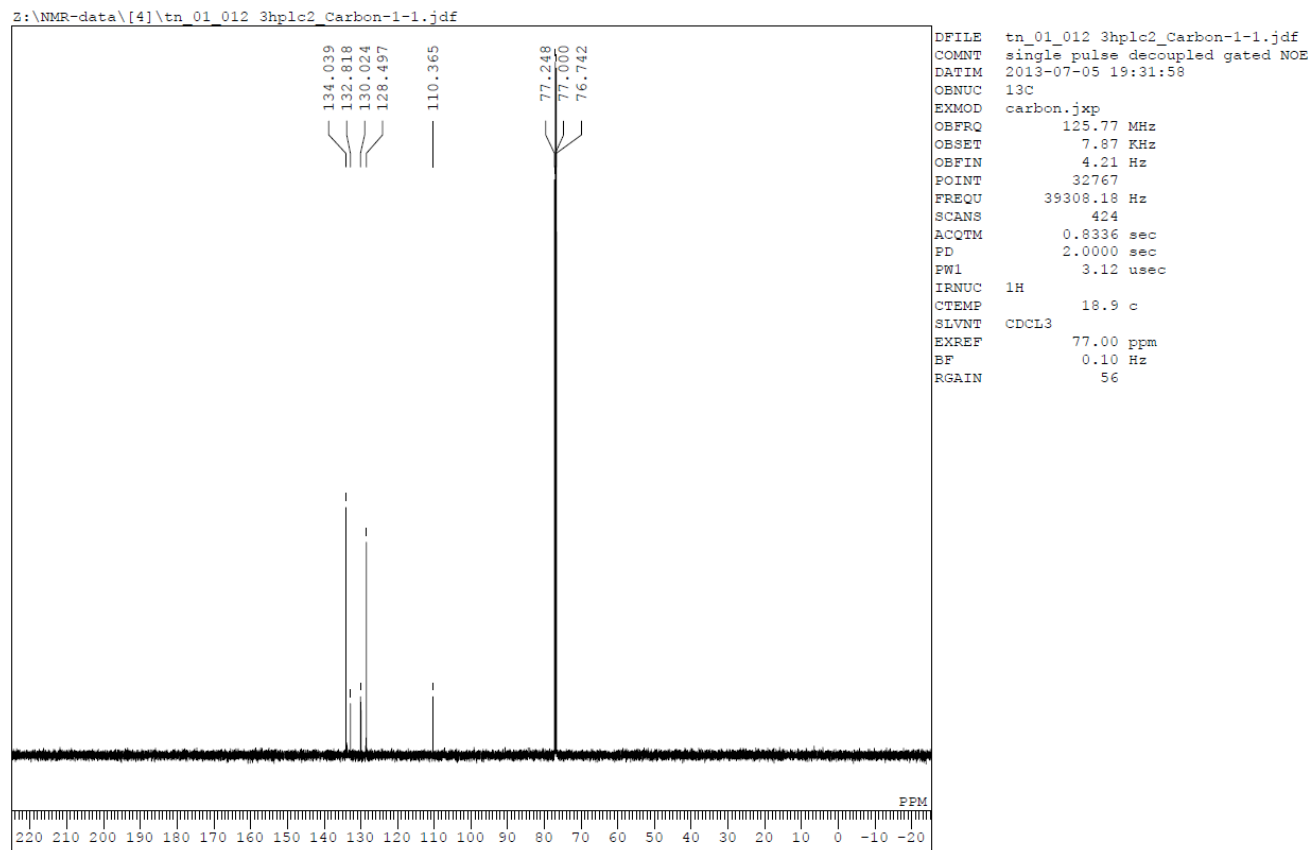

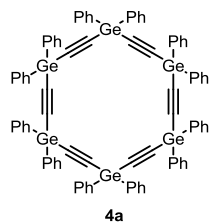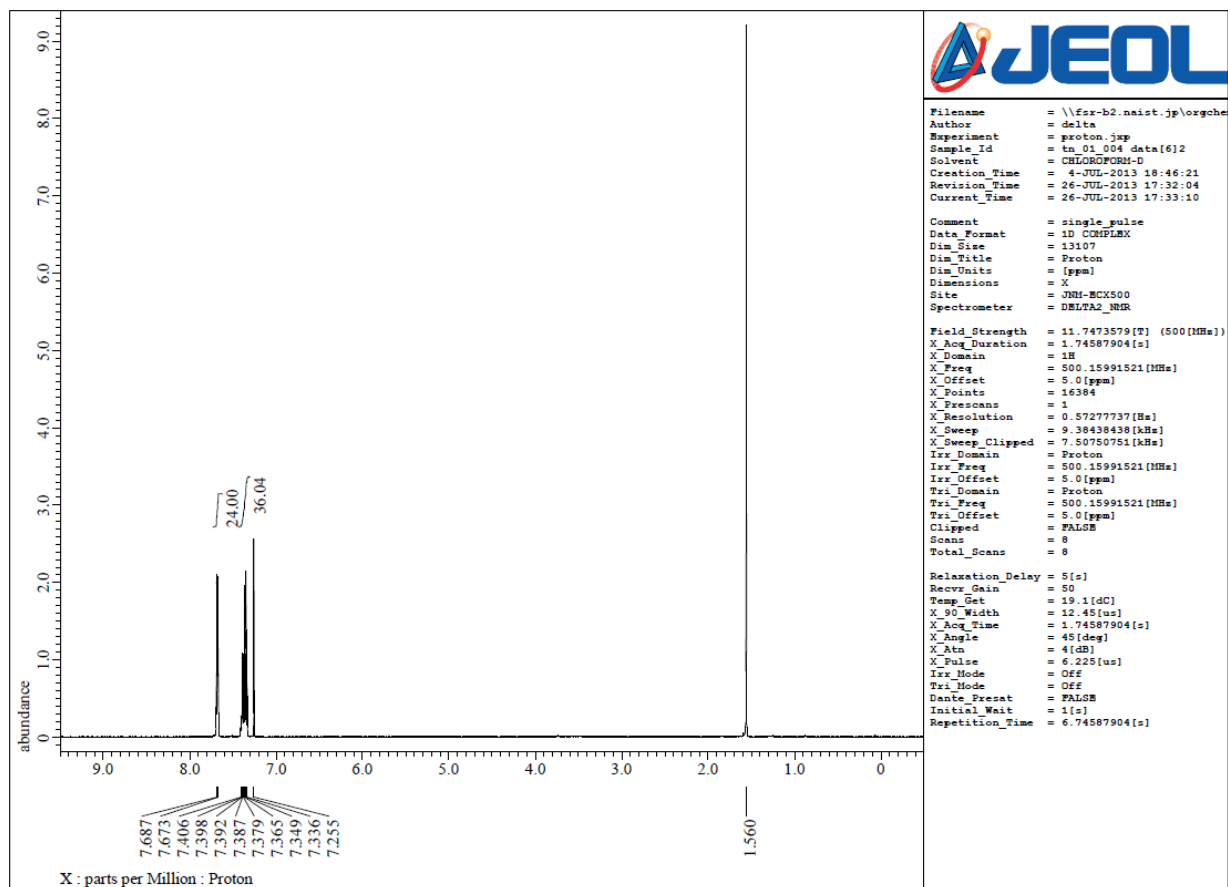

z:\NMR-data\[6]\tn\_01\_004\_data[6] Carbon-1-1.als

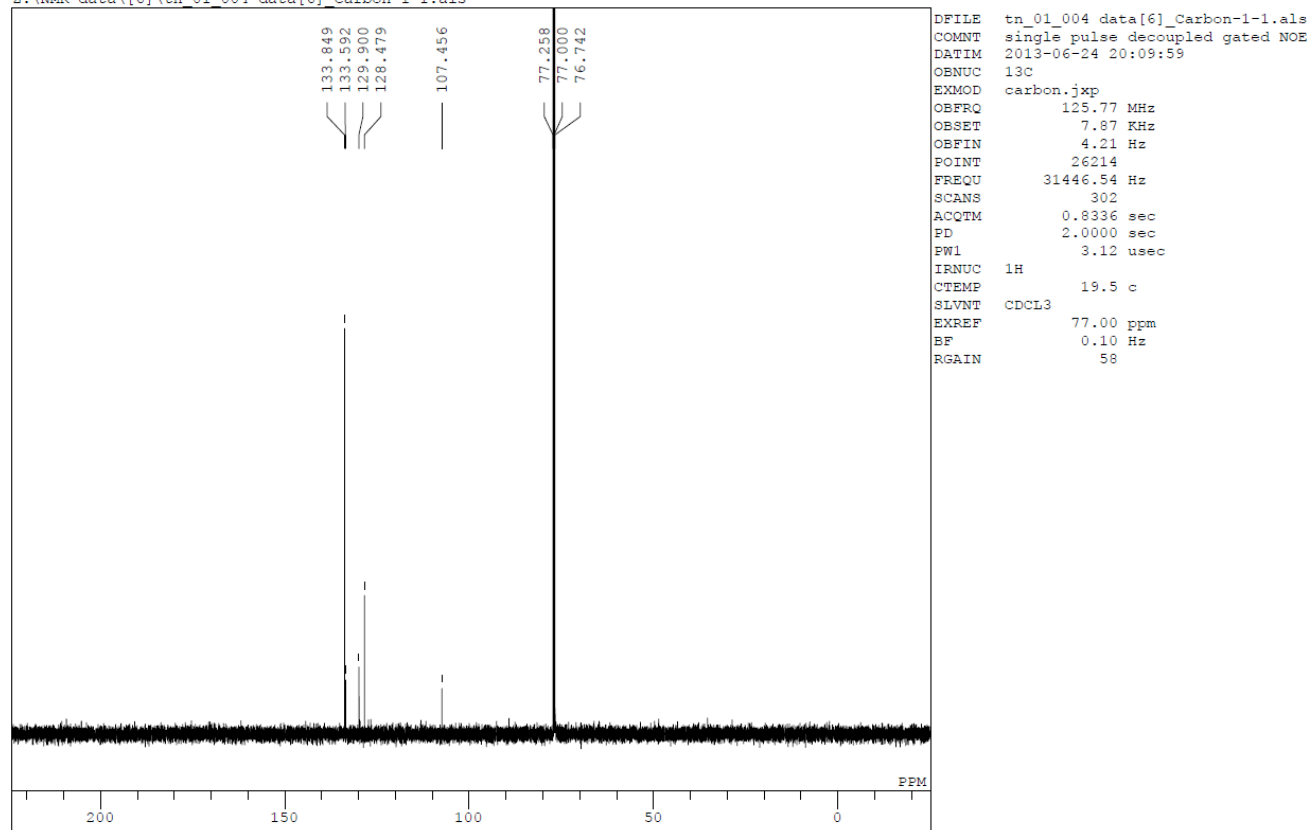

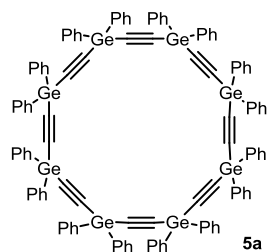

5a

Z:\NMR-data\[8]\tn\_01\_004 data[8] Proton-1-1.als

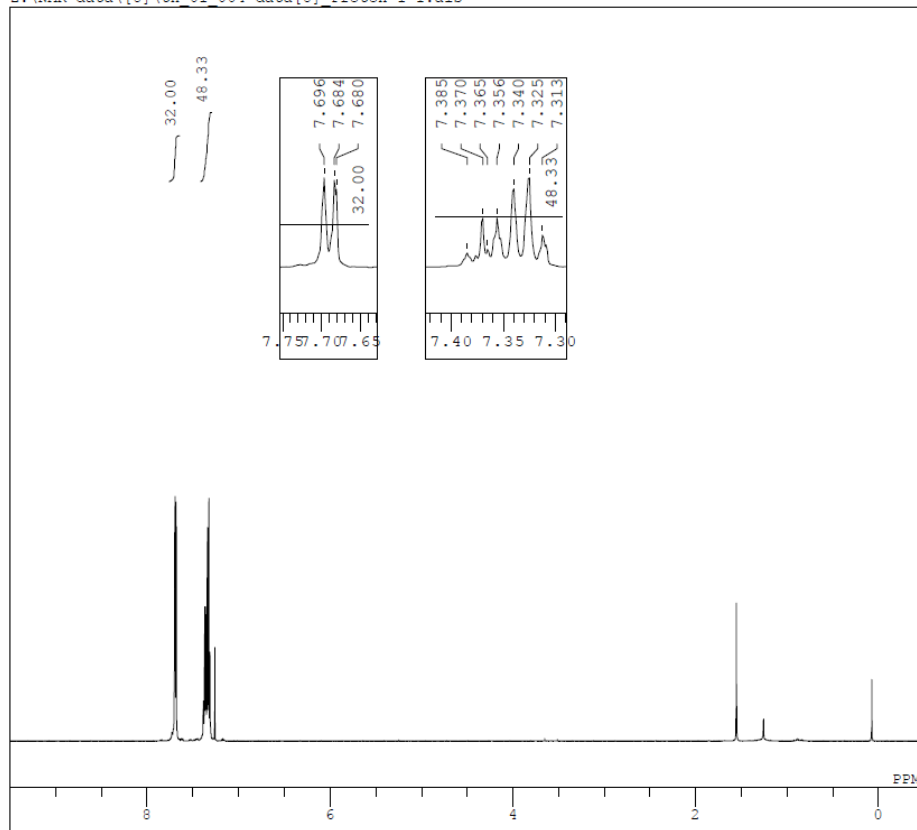

DFILE tn\_01\_004 data[8] Proton-1-1.als  
COMNT single\_pulse  
DATIM 2013-06-24 20:33:59  
OBNUC 1H  
EXMOD proton.jxp  
OBFRQ 500.16 MHz  
OBSET 2.41 KHz  
OBFIN 6.01 Hz  
POINT 13107  
FREQU 7507.51 Hz  
SCANS 8  
AQTM 1.7459 sec  
PD 5.0000 sec  
FWL 6.22 usec  
IRNUC 1H  
CTEMP 19.1 c  
SLVNT CDCL3  
EXREF 7.26 ppm  
BF 0.10 Hz  
RGAIN 46

Z:\NMR-data\[8]\tn\_01\_004 data[8] Carbon-1-1.jdf

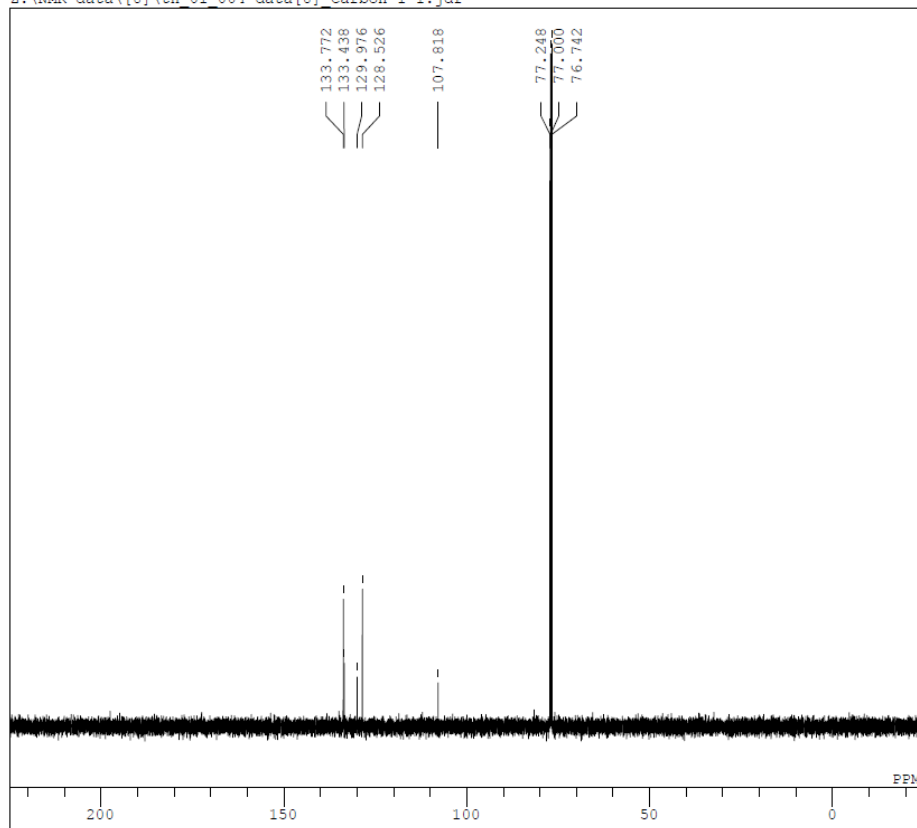

DFILE tn\_01\_004 data[8] Carbon-1-1.jdf  
COMNT single\_pulse decoupled gated NOE  
DATIM 2013-06-24 20:35:40  
OBNUC 13C  
EXMOD carbon.jxp  
OBFRQ 125.77 MHz  
OBSET 7.87 KHz  
OBFIN 4.21 Hz  
POINT 32767  
FREQU 39308.18 Hz  
SCANS 353  
AQTM 0.8336 sec  
PD 2.0000 sec  
FWL 3.12 usec  
IRNUC 1H  
CTEMP 19.0 c  
SLVNT CDCL3  
EXREF 77.00 ppm  
BF 0.10 Hz  
RGAIN 58

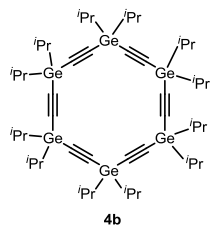

Z:\NMR-data\iPr-Ge[6]pericyclic\tn\_01\_039\_data\iProGe6\_Proton-1-1.als

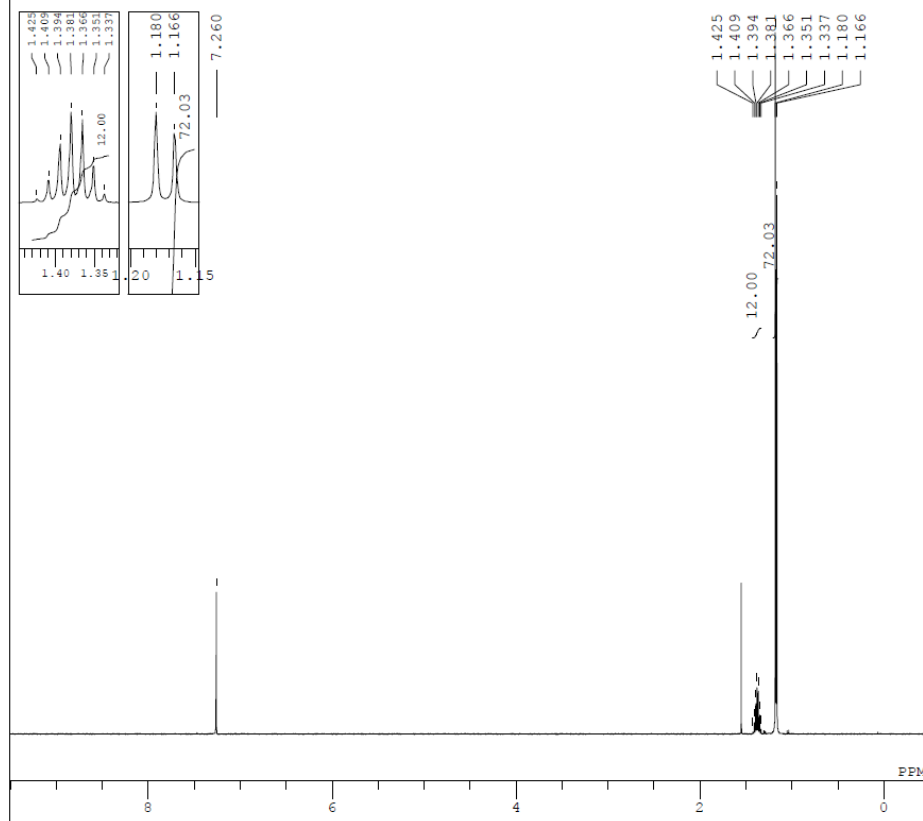

DFILE tn\_01\_039\_data\iProGe6\_Proton-1-1.als  
COMNT single\_pulse  
DATIM 2013-11-14 19:16:04  
OBNUC 1H  
EXMOD proton.jxp  
OBFRQ 500.16 MHz  
OBSET 2.41 KHz  
OBFIN 6.01 Hz  
POINT 13107  
FREQU 7507.51 Hz  
SCANS 8  
ACQTM 1.7459 sec  
PD 5.0000 sec  
FWL 6.22 usec  
IRNUC 1H  
CTEMP 16.6 c  
SLVNT CDCL3  
EXREF 7.26 ppm  
BF 0.10 Hz  
RGAIN 50

Z:\NMR-data\iPr-Ge[6]pericyclic\tn\_01\_039\_1hplc3\_Carbon-1-1.als

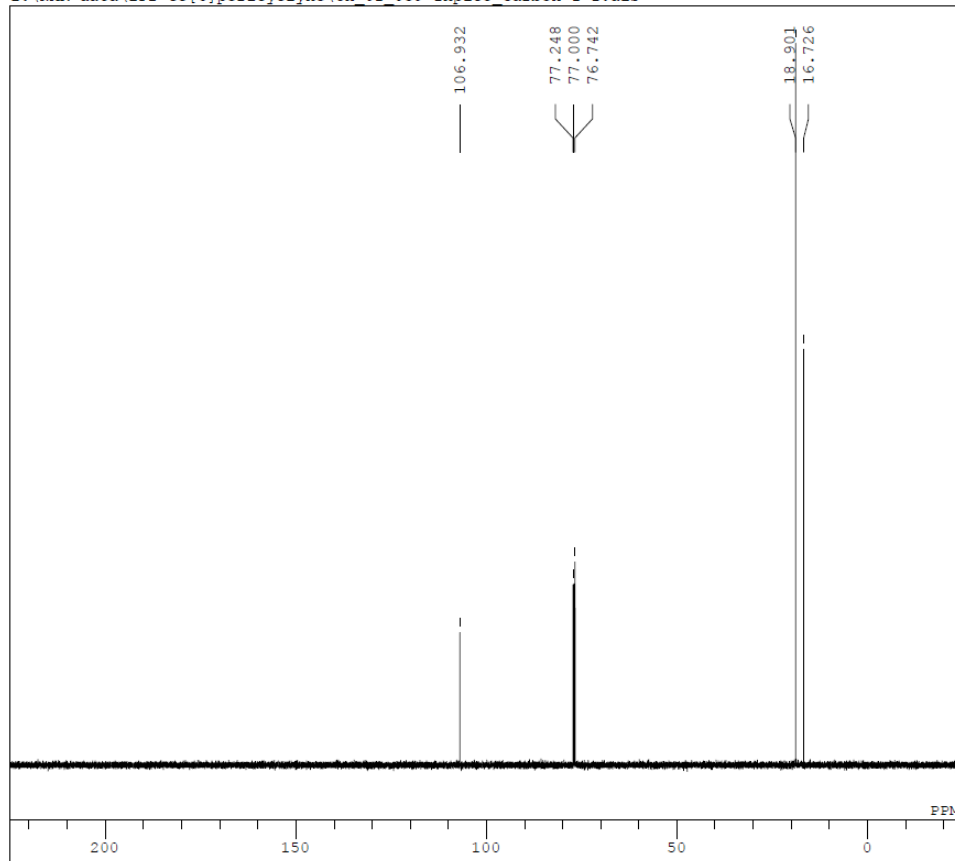

DFILE tn\_01\_039\_1hplc3\_Carbon-1-1.als  
COMNT single\_pulse decoupled gated NOE  
DATIM 2013-11-09 04:42:20  
OBNUC 13C  
EXMOD carbon.jxp  
OBFRQ 125.77 MHz  
OBSET 7.87 KHz  
OBFIN 4.21 Hz  
POINT 26214  
FREQU 31446.54 Hz  
SCANS 52  
ACQTM 0.8336 sec  
PD 2.0000 sec  
FWL 3.12 usec  
IRNUC 1H  
CTEMP 16.3 c  
SLVNT CDCL3  
EXREF 77.00 ppm  
BF 0.10 Hz  
RGAIN 56

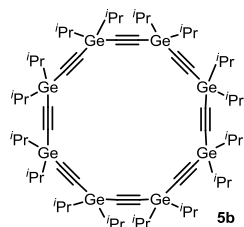

2:\NMR-data\iPr-Ge[8]pericyclic\tn\_01\_039 data\iProGe8\_Proton-1-1.als

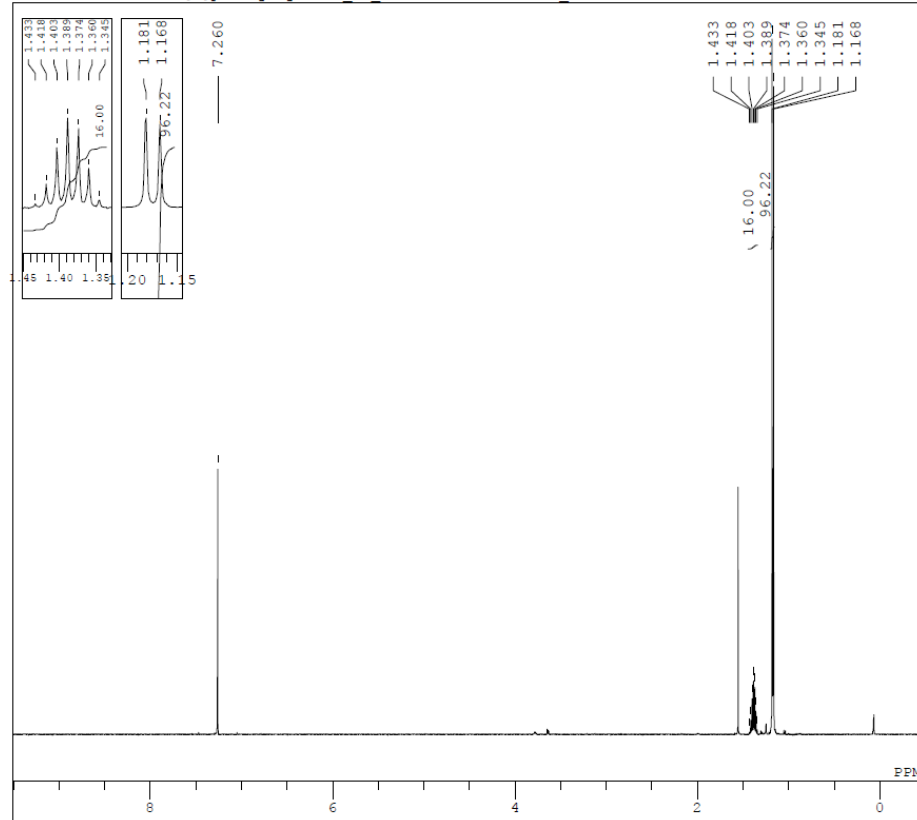

DFILE tn\_01\_039 data\iProGe8\_Proton-1-1.als  
 COMNT single\_pulse  
 DATIM 2013-11-14 19:24:09  
 OBNUC 1H  
 EXMOD proton.jxp  
 OBFREQ 500.16 MHz  
 OBSET 2.41 KHz  
 OBFIN 6.01 Hz  
 POINT 13107  
 FREQU 7507.51 Hz  
 SCANS 8  
 ACQTM 1.7459 sec  
 PD 5.0000 sec  
 PW1 6.22 usec  
 IRNUC 1H  
 CTEMP 16.5 c  
 SLVNT CDCL3  
 EXREF 7.26 ppm  
 BF 0.10 Hz  
 RGAIN 50

2:\NMR-data\iPr-Ge[8]pericyclic\tn\_01\_039 1hplc2\_Carbon-1-1.als

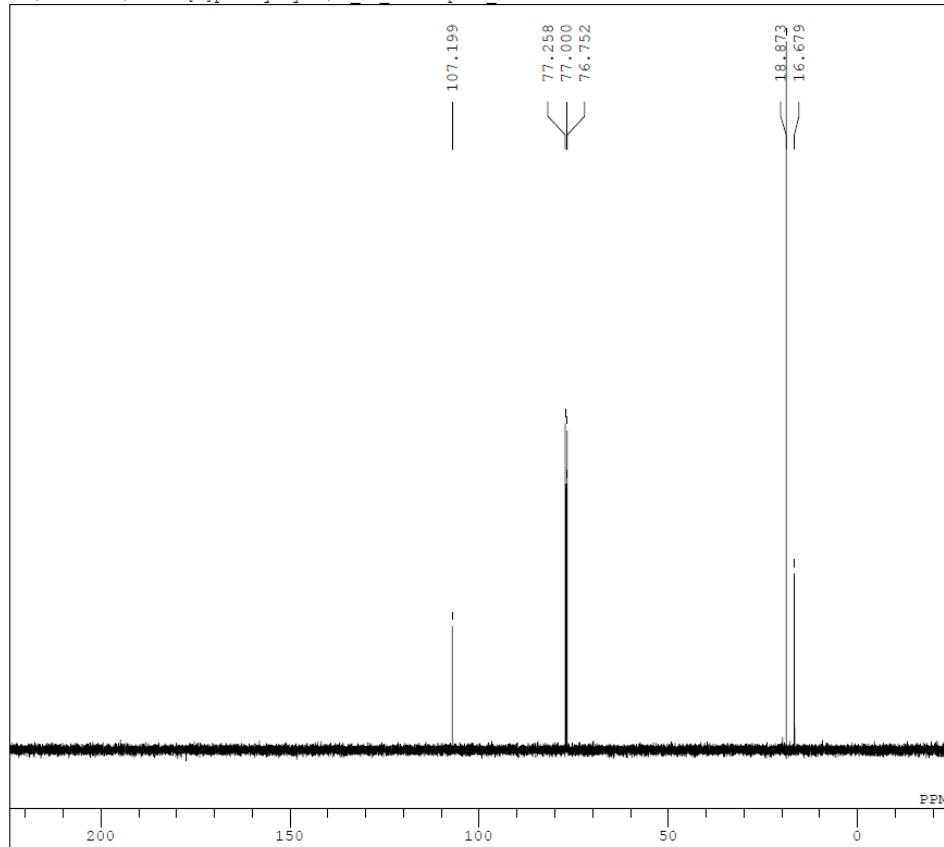

DFILE tn\_01\_039 1hplc2\_Carbon-1-1.als  
 COMNT single pulse decoupled gated NOE  
 DATIM 2013-11-09 04:31:55  
 OBNUC 13C  
 EXMOD carbon.jxp  
 OBFREQ 125.77 MHz  
 OBSET 7.87 KHz  
 OBFIN 4.21 Hz  
 POINT 26214  
 FREQU 31446.54 Hz  
 SCANS 45  
 ACQTM 0.8336 sec  
 PD 2.0000 sec  
 PW1 3.12 usec  
 IRNUC 1H  
 CTEMP 16.2 c  
 SLVNT CDCL3  
 EXREF 77.00 ppm  
 BF 0.10 Hz  
 RGAIN 56
